# Supplementary material for: Trends in and Future Research Direction of Antimicrobial Resistance in Global Aquaculture Systems: A Review
Source: MDPI journal article supplement (doi:10.3390/su15119012), 2023-06-02
Supplement: s1 [file s1]

Archive with 1 entries (1 files):
- sustainability-2297710-supplementary.pdf
