# Supplementary material for: Trends in and Future Research Direction of Antimicrobial Resistance in Global Aquaculture Systems: A Review
Source: MDPI journal article supplement (doi:10.3390/su15119012), 2023-06-02
Supplement: s1 [file s1 › sustainability-2297710-supplementary.pdf]

**Table S1.** Continents corresponding to colored circles in Figure 2B.

| Continent     | Country        | Color  |
|---------------|----------------|--------|
| Asia          | China          | red    |
| Asia          | Pakistan       | red    |
| Americas      | USA            | red    |
| Americas      | Canada         | red    |
| Europe        | United Kingdom | red    |
| Europe        | Denmark        | red    |
| Europe        | Finland        | red    |
| Europe        | Sweden         | red    |
| Europe        | Belgium        | red    |
| Europe        | Germany        | red    |
| Oceania       | Australia      | red    |
| Asia          | India          | blue   |
| Asia          | Korea          | blue   |
| Asia          | Saudi Arabia   | blue   |
| Asia          | Bangladesh     | blue   |
| Africa        | Egypt          | blue   |
| Africa        | Malaysia       | blue   |
| Africa        | Japan          | green  |
| Asia          | Vietnam        | green  |
| Asia          | Thailand       | green  |
| Europe        | France         | green  |
| Europe        | Switzerland    | green  |
| Europe        | Spain          | purple |
| Europe        | Portugal       | purple |
| Asia          | Iran           | purple |
| Asia          | Turkey         | purple |
| Europe        | Italy          | purple |
| Europe        | Netherlands    | purple |
| Europe        | Norway         | purple |
| South America | Chile          | purple |

**Table S2.** Top 10 highly cited papers on AMR research of global aquaculture systems in 2000–2021.

| Title of Literature                                                                                                                        | TC   | TC/Year | Type    | Reference |
|--------------------------------------------------------------------------------------------------------------------------------------------|------|---------|---------|-----------|
| Heavy use of prophylactic antibiotics in aquaculture: a growing problem for human and animal health and for the environment                | 1234 | 72      | Review  | [1]       |
| Environmental pollution by antibiotics and by antibiotic resistance determinants                                                           | 1023 | 72      | Review  | [2]       |
| Aquaculture practices and potential human health risks: Current knowledge and future priorities                                            | 483  | 32      | Review  | [3]       |
| Heavy metal driven co-selection of antibiotic resistance in soil and water bodies impacted by agriculture and aquaculture                  | 456  | 41      | Review  | [4]       |
| Management Options for Reducing the Release of Antibiotics and Antibiotic Resistance Genes to the Environment                              | 430  | 42      | Review  | [5]       |
| Occurrence of sulfonamide and tetracycline-resistant bacteria and resistance genes in aquaculture environment                              | 388  | 34      | Article | [6]       |
| Occurrence and distribution of antibiotics in coastal water of the Bohai Bay, China: impacts of river discharge and aquaculture activities | 301  | 24      | Article | [7]       |
| Multiple Antimicrobial Resistance in Plague: An Emerging Public Health Risk                                                                | 288  | 18      | Article | [8]       |
| Human Health Consequences of Use of Antimicrobial Agents in Aquaculture                                                                    | 272  | 19      | Review  | [9]       |
| Microbial manipulations to improve fish health and production—A Mediterranean perspective                                                  | 259  | 21      | Review  | [10]      |

Note: TC: total citations; TC/ Year: average citations per year.

**Table S3.** Thirty papers on AMR research in global aquaculture systems recently published in 2021.

| Title                                                                                                                                                                           | Location               | Research Direction                                                                                               |
|---------------------------------------------------------------------------------------------------------------------------------------------------------------------------------|------------------------|------------------------------------------------------------------------------------------------------------------|
| A systematic review on antibiotics misuse in livestock and aquaculture and regulation implications in China                                                                     | China                  | Antibiotic misuse and residuals.                                                                                 |
| The key environmental influencing factors for the change of sediment bacterial community and antibiotics resistance genes in a long-term polluted lake, China                   | Bayanihan River, China | Antibiotic misuse and residuals.                                                                                 |
| Antibiotics control in aquaculture requires more than antibiotic-free feeds: A tilapia farming case                                                                             | southern China         | Antibiotic misuse and residuals.                                                                                 |
| Occurrence of residues of veterinary antibiotics in water, sediment and trout tissue ( <i>Oncorhynchus mykiss</i> ) in the southern area of Lake Titicaca, Peru                 | Lake Titicaca, Peru    | Antibiotic misuse and residuals.                                                                                 |
| High throughput sequencing reveals the abundance and diversity of antibiotic-resistant bacteria in aquaculture wastewaters, Shandong, China                                     | Shandong, China        | Identification of ARGs and ARBs.                                                                                 |
| Gopalan Krishnan Sivaraman1 *, Vineeth Rajan1, Ardhra Vijayan1, Ravikrishnan Elangovan2, Alison Prendiville3 and Till T. Bachmann4                                              | Kerala, India          | Identification of ARGs and ARBs.                                                                                 |
| Characterization of Pathogenic <i>Vibrio parahaemolyticus</i> Isolated From Fish Aquaculture of the Southwest Coastal Area of Bangladesh                                        | Bangladesh             | Identification of ARGs and ARBs.                                                                                 |
| A comprehensive perspective on a <i>Vagococcus salmoninarum</i> outbreak in rainbow trout broodstock                                                                            | Turkey                 | Identification of ARGs and ARBs.                                                                                 |
| Genome analysis and antimicrobial resistance characteristics of <i>Chryseobacterium aquaticum</i> isolated from farmed salmonids                                                | Turkey                 | Identification of ARGs and ARBs.                                                                                 |
| Plasmid-mediated antimicrobial resistance in motile aeromonads from diseased Nile tilapia ( <i>Oreochromis niloticus</i> )                                                      | Kerala, India          | Identification of ARGs and ARBs.                                                                                 |
| Upraising a silent pollution: Antibiotic resistance at coastal environments and transference to long-distance migratory shorebirds                                              | Chile                  | Identification of ARGs and ARBs.                                                                                 |
| Antibiotic resistance of culturable heterotrophic bacteria isolated from shrimp ( <i>Penaeus vannamei</i> ) aquaculture ponds                                                   | Andhra Pradesh, India  | Identification of ARGs and ARBs.                                                                                 |
| Spatiotemporal variations and source tracking of antibiotics in an ecological aquaculture farm in Southern China                                                                | Guangdong, China       | Antibiotic misuse and residuals; the relationship among environmental variables, antibiotic residuals, and ARGs. |
| Antibiotic resistance genes and mobile genetic elements in a rural river in Southeast China: Occurrence, seasonal variation and association with the antibiotics                | Taige Canal, China     | Antibiotic misuse and residuals; the relationship among environmental variables, antibiotic residuals, and ARGs. |
| Monitoring of antimicrobial resistance genes in the spotted sea bass ( <i>Lateolabrax maculatus</i> ): Association with the microbiome and its environment in aquaculture ponds | Guangdong, China       | Identification of ARGs and ARBs; the relationship among environmental variables, antibiotic residuals, and ARGs. |
| Virulotyping and genetic diversity of <i>Aeromonas hydrophila</i> isolated from Nile tilapia ( <i>Oreochromis niloticus</i> ) in aquaculture farms in Egypt                     | Egypt                  | Identification of ARGs and ARBs; the relationship among environmental variables, antibiotic residuals, and ARGs. |
| Environmental antimicrobial resistance is associated with faecal pollution in Central Thailand's coastal aquaculture region                                                     | Bangkok, Thailand      | Antibiotic misuse and residuals; identification of ARGs and ARBs; the relationship among                         |

|                                                                                                                                                                                                                                              |                 |                                                                                                                                                                                                               |
|----------------------------------------------------------------------------------------------------------------------------------------------------------------------------------------------------------------------------------------------|-----------------|---------------------------------------------------------------------------------------------------------------------------------------------------------------------------------------------------------------|
| Responses of sediment resistome, virulence factors and potential pathogens to decades of antibiotics pollution in a shrimp aquafarm                                                                                                          | Ningbo, China   | environmental variables, antibiotic residuals, and ARGs.<br>Antibiotic misuse and residuals; identification of ARGs and ARBs; the relationship among environmental variables, antibiotic residuals, and ARGs. |
| Characteristics of bacterial community and ARGs profile in engineered goldfish tanks with stresses of sulfanilamide and copper                                                                                                               | China           | Antibiotic misuse and residuals; identification of ARGs and ARBs; the relationship among environmental variables, antibiotic residuals, and ARGs.                                                             |
| Antibiotic resistant bacteria and genes in shrimp aquaculture water: Identification and removal by ferrate (VI)                                                                                                                              | Thailand        | Antibiotic misuse and residuals; identification ARGs and ARBs; measures: Fe (VI) removes antibiotics, ARBs, and ARG.                                                                                          |
| Removal of antibiotic resistance genes and inactivation of antibiotic-resistant bacteria by oxidative treatments                                                                                                                             | China           | Measures: high chlorine concentrations could efficiently remove ARGs.                                                                                                                                         |
| Ozone nanobubble treatments improve survivability of Nile tilapia ( <i>Oreochromis niloticus</i> ) challenged with a pathogenic multi-drug-resistant <i>Aeromonas hydrophila</i>                                                             | China           | Measures: ozone nanobubbles (NB-O3) reduced concentrations of pathogenic bacteria.                                                                                                                            |
| Implementation of a constructed wetland for the sustainable treatment of inland shrimp farming water                                                                                                                                         | Viet Nam        | Measures: constructed wetlands with the horizontal subsurface flow as a water treatment filter.                                                                                                               |
| Actinonin resistance of pathogenic <i>Vibrio anguillarum</i> in aquaculture                                                                                                                                                                  | China           | Measures: the combined use of an anaerobic-respiratory inhibitor and an antibiotic to treat ARBs.                                                                                                             |
| Screening of intestinal probiotics and the effects of feeding probiotics on the digestive enzyme activity, immune, intestinal flora and WSSV resistance of <i>Procambarus clarkii</i>                                                        | China           | Measures: <i>Bacillus amyloliquefaciens</i> as a probiotic.                                                                                                                                                   |
| Probiotic <i>Bacillus safensis</i> NPUST1 Administration Improves Growth Performance, Gut Microbiota, and Innate Immunity against <i>Streptococcus iniae</i> in Nile tilapia ( <i>Oreochromis niloticus</i> )                                | Pingtung, China | Measures: <i>Bacillus safensis</i> NPUST1 as a probiotic.                                                                                                                                                     |
| The <i>Roseobacter</i> -Group Bacterium <i>Phaeobacter</i> as a Safe Probiotic Solution for Aquaculture                                                                                                                                      | Denmark         | Measures: <i>Phaeobacter inhibens</i> as a probiotic                                                                                                                                                          |
| Effects of Dietary Mannan Oligosaccharides on Non-Specific Immunity, Intestinal Health, and Antibiotic Resistance Genes in Pacific White Shrimp <i>Litopenaeus vannamei</i>                                                                  | China           | Measures: dietary mannan oligosaccharides (0.08%) can decrease ARGs and MGEs.                                                                                                                                 |
| Effectively reducing antibiotic contamination and resistance in fishery by efficient gastrointestinal-blood delivering dietary millispheres                                                                                                  | China           | Measures: antibiotic-laden dietary milli spheres reduce antibiotic contamination in water and sediment.                                                                                                       |
| Effects of dietary hydrolyzable tannins on growth performance, antioxidant capacity, intestinal microflora and resistance against <i>Vibrio parahaemolyticus</i> of juvenile Pacific white shrimp, <i>Litopenaeus vannamei</i> (Boone, 1931) | China           | Measures: tannins against <i>Vibrio parahaemolyticus</i> .                                                                                                                                                    |

Note: ARGs: antibiotic resistance genes; ARBs: antibiotic resistance bacteria.

#### Reference:

1. Cabello, F.C. Heavy use of prophylactic antibiotics in aquaculture: A growing problem for human and animal health and for the environment. *Environ. Microbiol.* **2006**, *8*, 1137–1144. <https://doi.org/10.1111/j.1462-2920.2006.01054.x>

2. Martinez, J.L. Environmental pollution by antibiotics and by antibiotic resistance determinants. *Environ. Pollut.* **2009**, *157*, 2893–2902. <https://doi.org/10.1016/j.envpol.2009.05.051>.
3. Sapkota, A.; Sapkota, A.R.; Kucharski, M.; Burke, J.; McKenzie, S.; Walker, P.; Lawrence, R. Aquaculture practices and potential human health risks: Current knowledge and future priorities. *Environ. Int.* **2008**, *34*, 1215–1226. <https://doi.org/10.1016/j.ijantimicag.2018.03.010>.
4. Seiler, C.; Berendonk, T.U. Heavy metal driven co-selection of antibiotic resistance in soil and water bodies impacted by agriculture and aquaculture. *Front. Microbiol.* **2012**, *3*, 399. <https://doi.org/10.3389/fmicb.2012.00399>.
5. Pruden, A.; Larsson, D.J.; Amézquita, A.; Collignon, P.; Brandt, K.K.; Graham, D.W.; Lazorchak, J.M.; Suzuki, S.; Silley, P.; Snape, J.R. Management options for reducing the release of antibiotics and antibiotic resistance genes to the environment. *Environ. Health Perspect.* **2013**, *121*, 878–885. <https://doi.org/10.1289/ehp.1206446>.
6. Gao, P.; Mao, D.; Luo, Y.; Wang, L.; Xu, B.; Xu, L. Occurrence of sulfonamide and tetracycline-resistant bacteria and resistance genes in aquaculture environment. *Water Res.* **2012**, *46*, 2355–2364. <https://doi.org/10.1016/j.watres.2012.02.004>.
7. Zou, S.; Xu, W.; Zhang, R.; Tang, J.; Chen, Y.; Zhang, G. Occurrence and distribution of antibiotics in coastal water of the Bohai Bay, China: Impacts of river discharge and aquaculture activities. *Environ. Pollut.* **2011**, *159*, 2913–2920. <https://doi.org/10.1016/j.envpol.2011.04.037>.
8. Welch, T.J.; Fricke, W.F.; Mcdermott, P.F.; White, D.G.; Rosso, M.-L.; Rasko, D.A.; Mammel, M.K.; Eppinger, M.; Rosovitz, M.; Wagner, D. Multiple antimicrobial resistance in plague: An emerging public health risk. *PLoS ONE*. **2007**, *2*, e309. <https://doi.org/10.1371/journal.pone.0000309>.
9. Heuer, O.E.; Kruse, H.; Grave, K.; Collignon, P.; Karunasagar, I.; Angulo, F.J. Human health consequences of use of antimicrobial agents in aquaculture. *Clin. Infect. Dis.* **2009**, *49*, 1248–1253. <https://doi.org/10.1086/605667>.
10. Dimitroglou, A.; Merrifield, D.L.; Carnevali, O.; Picchiatti, S.; Avella, M.; Daniels, C.; Güroy, D.; Davies, S.J. Microbial manipulations to improve fish health and production—a Mediterranean perspective. *Fish Shellfish Immunol.* **2011**, *30*, 1–16. <https://doi.org/10.1016/j.fsi.2010.08.009>.
